# Supplementary material for: Systemizing a rural livelihood diversification framework for sustainable community-based agritourism: A participatory approach to ensure resilience
Source: Frontiers journal article supplement (doi:10.3389/fsufs.2022.993892), 2022-12-02

*It all starts with*

## URBANIZATION & THE URBAN-RURAL DIVIDE

As resources converge into cities, rural areas lose attractiveness due to their lack of employment/education opportunities

*so*

we need

## rural livelihood diversification

*how?*

to support

## sustainable local food systems

*why?*

communities can reconnect to their

## AUTHENTIC SENSE OF PLACE/BELONGING

by developing a

## COMMUNITY-DRIVEN BRAND

which can provide 4 main benefits:

- **environmental**: local biodiversity preservation and habitat provision
- **economic**: value-added rural development, not limited to agricultural income streams
- **socio-cultural**: inclusive inter-generational diversification practices to preserve local traditions and intangible heritage
- **health**: medicinal and nutritional value of seasonal and indigenous ingredients

*The coffee example:*

from  
agroforestry  
crop  
diversification

byproduct  
(cascara  
coffee flower  
sold as tea)

to circular  
zero-waste  
business  
models for  
livelihood  
diversification

main product  
(coffee)

*so that*

## COMMUNITY RESILIENCE

is ensured.

to redefine the socio-cultural perception of

## FARMERS AS AGRIPRENEURS

so that RURAL LIVELIHOODS become a synonym of  
A PROFITABLE AND SOCIALLY  
RESPECTED LIFESTYLE

Harvesting, planting,  
foraging workshops

Farm to  
fork  
experience  
tourism

Local  
guides  
leading  
wild food  
walks

Chemical-free  
tie-dye  
workshops  
with  
natural  
ingredients

Cooking  
workshops  
with  
indigenous  
ingredients

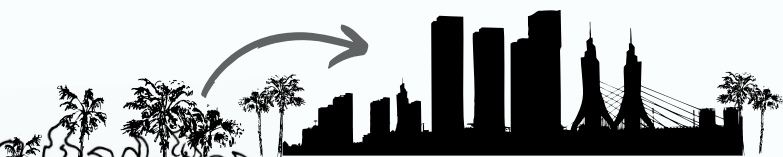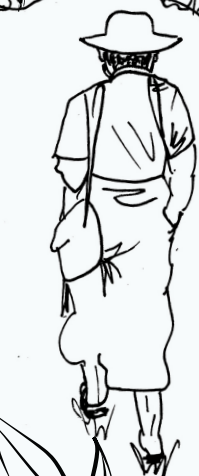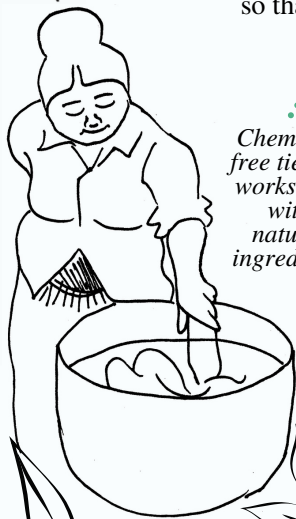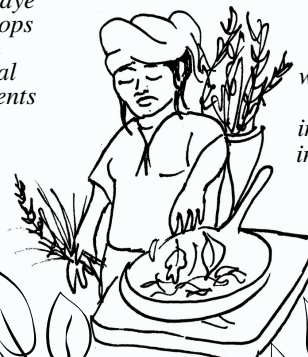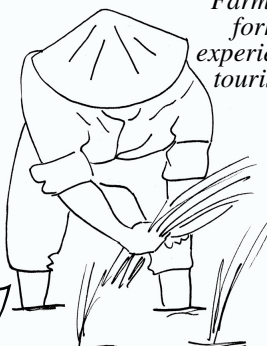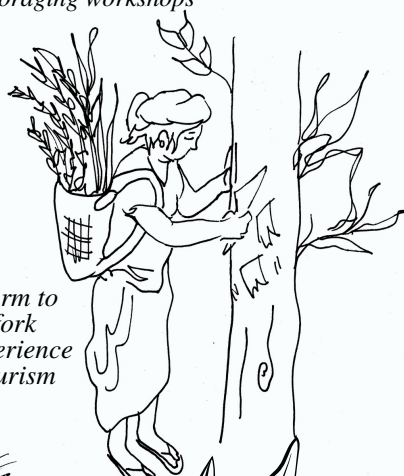

Supplement: Image_1.pdf [file Image_1.pdf]
