# Supplementary material for: Systemizing a rural livelihood diversification framework for sustainable community-based agritourism: A participatory approach to ensure resilience
Source: Frontiers journal article supplement (doi:10.3389/fsufs.2022.993892), 2022-12-02
Supplement: Table_1.docx [file Table_1.docx]

Table 1: 4 common literature dimensions emerging from 3 theoretical frameworks (source: authors)

| **3 theoretical frameworks (with pillars)** | **4 literature dimensions** | | | | |
| --- | --- | --- | --- | --- | --- |
| **ENVIRONMENTAL** | **SOCIAL** | | **ECONOMIC** | **HEALTH** |
| **Food Security and Nutrition [1]** | Food Availability | Food Access | | Food Stability | Food Utilization |
| **Sustainable Development [2]** | Planet | People | | Profit | Health  (*integrated One Health approach) |
| **Sustainable Livelihoods [3]** | Natural Capital | Social Capital | Physical Capital | Financial Capital | Human Capital |
| Indicators emerging from the literature | Indicators related to climate adaptation and mitigation strategies in terms of biodiversity preservation and habitat provision. Sustainable resource management to preserve all 4 groups of ecosystem services: provisioning, regulating, cultural, and supporting. | Indicators related to intersectional access and control over natural resources. Measuring community participation and equity, community integrity, biocultural education, social inclusion. | | Indicators related to poverty alleviation: use-value (related to monetary income) and non-use value (related to community resilience, capacity building, skills development and assets which cannot be monetized). | Indicators related to proper biological, medicinal, nutritional value of native, indigenous, and seasonal foods and diets. |
