# Supplementary material for: Systemizing a rural livelihood diversification framework for sustainable community-based agritourism: A participatory approach to ensure resilience
Source: Frontiers journal article supplement (doi:10.3389/fsufs.2022.993892), 2022-12-02
Supplement: Table_2.docx [file Table_2.docx]

| **Dimensions** | **Indicators** | | **Not Relevant**  **(≤ 2)** | **Relevant**  **(≥ 3)** | **I-CVI** | **Interpretation** | **S-CVI/AVG per section** |
| --- | --- | --- | --- | --- | --- | --- | --- |
| **Environmental**  (natural resources: provisioning, regulating, supporting ecosystem services) | A. Fresh water | | 2 | 15 | 0.88 | Appropriate | 0.90 |
| B. Food/fodder, forest products, fiber | | 3 | 14 | 0.82 | Appropriate |
| C. Drought and soil erosion management (upstream plan) | | 3 | 14 | 0.82 | Appropriate |
| D. Soil quality and nutrient recycling (downstream plan) | | 0 | 17 | 1.0 | Appropriate |
| E. Biodiversity preservation and habitat provision | | 0 | 17 | 1.0 | Appropriate |
| **Sociocultural**  (access and control over natural resources, equity and social relations, cultural ecosystem services) | A. Social networks and collective organization of farmers | | 3 | 14 | 0.82 | Appropriate | 0.87 |
| B. Intersectional participationandsocial inclusionof vulnerable and marginalized groups | | 2 | 15 | 0.88 | Appropriate |
| C. Educational activities for consumers and producers | | 2 | 15 | 0.88 | Appropriate |
| D. Community identity and integrity, sense of place | | 1 | 16 | 0.94 | Appropriate |
| E. Spiritual values and sacred grounds | | 3 | 14 | 0.82 | Appropriate |
| F. Scenery and mosaic landscapes | | 2 | 15 | 0.88 | Appropriate |
| G. Access and control over land and natural resources | | Added | | | |
| **Economic**  (food stability and financial capital) | A. Use-value (products and services) | 1. Agri-accommodation services (staying in the local community) | 3 | 14 | 0.82 | Appropriate | 0.89 |
| 2. Agri-food services (eating in the local community) | 2 | 15 | 0.88 | Appropriate |
| 3. Cultural tourism supporting local products | 1 | 16 | 0.94 | Appropriate |
| 4 Primary agritourism workshops | 2 | 15 | 0.88 | Appropriate |
| 5. Direct sales | 2 | 15 | 0.88 | Appropriate |
| 6. New alternative jobs for community members | 2 | 15 | 0.88 | Appropriate |
| 7. Income distribution and local economy development | Added | | | |
| B. Non-use value (not monetized) | 8. Local ecosystem services increase in value (as a tourism asset) | 2 | 15 | 0.88 | Appropriate |
| 9. Capacity building and skills development for community members | 0 | 17 | 1.0 | Appropriate |
| 10. Volunteering activities in the community | Added | | | |
| **Health**  (food utilization, local/indigenous diets, nutrition) | A. Seasonal local foods/diets | | 2 | 15 | 0.88 | Appropriate | 0.88 |
| B. Native indigenous foods/diets | | 2 | 15 | 0.88 | Appropriate |
| C. Medicinal purposes of wild foods | | 2 | 15 | 0.88 | Appropriate |
