# Supplementary material for: Systemizing a rural livelihood diversification framework for sustainable community-based agritourism: A participatory approach to ensure resilience
Source: Frontiers journal article supplement (doi:10.3389/fsufs.2022.993892), 2022-12-02
Supplement: Table_3.docx [file Table_3.docx]

| **Sectoral profile** | **Number of interviews** | **Code** |
| --- | --- | --- |
| Community Leaders | 10 | CL |
| Community Members | 14 | CM |
| NGOs (and CSOs) | 13 | N |
| Farmers’ Groups, social and ancestral Networks | 3 | FGN |
| Private Sector | 21 | P |
| Government | 11 | G |
| Intergovernmental Organizations | 1 | I |
| Academia (and research institutes) | 17 | A |
| Total | 90 | - |
