# Supplementary material for: Systemizing a rural livelihood diversification framework for sustainable community-based agritourism: A participatory approach to ensure resilience
Source: Frontiers journal article supplement (doi:10.3389/fsufs.2022.993892), 2022-12-02
Supplement: Table_5.docx [file Table_5.docx]

Table 5: prioritized research findings with a high value of 3 (source: authors)

| Legend: interpretation scored with 1 point for CVI > 0.90, 1 point for observation from all fields, 1 point for both in-depth and semi-structured interviews | | | | | | | |
| --- | --- | --- | --- | --- | --- | --- | --- |
| **Indicators** | **Description** | **CVI score** | **Observation** | | | **Interviews** | **Interpretation (score)** |
| **Huai Hin Dam** | **Romyen** | **Na Yang** |
| 1.E | Biodiversity preservation and habitat provision | 1 | X | X | X | I,S | 3 |
| 2.D | Community identity and integrity, sense of place | 0.94 | X | X | X | I,S | 3 |
| 3.A.3 | Cultural tourism supporting local products | 0.94 | X | X | X | I,S | 3 |
| 3.B.9 | Capacity building and skills development for community members | 1 | X | X | X | I,S | 3 |
